# Supplementary material for: Factors Associated with Antimicrobial Stewardship Practices on California Dairies: One Year Post Senate Bill 27
Source: MDPI journal article supplement (doi:10.3390/antibiotics11020165), 2022-01-27
Supplement: s1 [file s1]

**Table S5.** Summary of descriptive analysis of dairy producers' respondents classified as having "limited-moderate knowledge" or "good to excellent knowledge" in antimicrobial stewardship practices (AMS) based on responses obtained from 113 conventional California dairies.

| Variables                                       | AMS Knowledge of dairy producers in CA |               |                   |               | P-value |
|-------------------------------------------------|----------------------------------------|---------------|-------------------|---------------|---------|
|                                                 | Limited to moderate                    |               | Good to excellent |               |         |
|                                                 | N                                      | % ± SE        | N                 | % ± SE        |         |
| <b>Region</b>                                   |                                        |               |                   |               |         |
| Greater southern CA                             | 7/51                                   | 13.72 ± 4.81  | 44/51             | 86.27 ± 4.81  | <0.01   |
| Northern Central CA                             | 15/51                                  | 29.41 ± 6.38  | 36/51             | 70.58 ± 6.38  | <0.01   |
| Northern CA                                     | 1/7                                    | 14.28 ± 13.22 | 6/7               | 85.71 ± 13.22 | <0.01   |
| <b>Herd size (milking cows/herd)</b>            |                                        |               |                   |               |         |
| <1305                                           | (15/59)                                | 25.42 ± 5.66  | (44/59)           | 74.00 ± 5.66  | <0.01   |
| ≥1305                                           | (8/50)                                 | 16.00 ± 5.23  | (42/50)           | 84.00 ± 5.23  | <0.01   |
| <b>Annual Rolling herd average (Kg/cow)</b>     |                                        |               |                   |               |         |
| <10,888                                         | 6/19                                   | 31.57 ± 10.95 | 13/19             | 68.42 ± 10.95 | 0.02    |
| ≥10,888                                         | 12/85                                  | 14.11 ± 3.79  | 73/85             | 85.88 ± 3.79  | <0.01   |
| <b>Use written/computerized health protocol</b> |                                        |               |                   |               |         |
| No                                              | 3/19                                   | 15.78 ± 8.40  | 16/19             | 84.21 ± 8.40  | <0.01   |
| Yes                                             | 19/78                                  | 24.35 ± 4.86  | 59/78             | 75.64 ± 4.86  | <0.01   |
| <b>Have drug inventory log</b>                  |                                        |               |                   |               |         |
| No                                              | 14/63                                  | 22.22 ± 5.23  | 49/63             | 77.77 ± 5.23  | <0.01   |
| Yes                                             | 8/43                                   | 18.60 ± 5.93  | 35/43             | 81.39 ± 5.93  | <0.01   |
| <b>Track AMD withdrawal periods</b>             |                                        |               |                   |               |         |
| No                                              | 11/35                                  | 31.42 ± 7.84  | 24/35             | 68.57 ± 7.84  | <0.01   |
| Yes                                             | 12/74                                  | 16.21 ± 4.28  | 62/74             | 83.78 ± 4.28  | <0.01   |
| <b>Vaccinate cows against mastitis</b>          |                                        |               |                   |               |         |
| No                                              | 6/20                                   | 30.00 ± 10.24 | 14/20             | 70.00 ± 10.24 | 0.01    |
| Yes                                             | 12/78                                  | 15.38 ± 4.10  | 66/78             | 84.61 ± 4.10  | <0.01   |
| <b>Familiarity with MIADs</b>                   |                                        |               |                   |               |         |
| Not familiar                                    | 16/37                                  | 43.24 ± 8.14  | 21/37             | 56.75 ± 8.14  | 0.245   |
| Familiar                                        | 7/71                                   | 9.85 ± 3.53   | 64/71             | 90.14 ± 3.53  | <0.01   |
| <b>Aware that MIADs require prescription</b>    |                                        |               |                   |               |         |
| No                                              | 1/4                                    | 25.00 ± 21.65 | 3/4               | 75.00 ± 21.65 | 0.16    |
| Yes                                             | 22/103                                 | 21.35 ± 4.03  | 81/103            | 78.64 ± 4.03  | <0.01   |
