# Supplementary material for: Factors Associated with Antimicrobial Stewardship Practices on California Dairies: One Year Post Senate Bill 27
Source: MDPI journal article supplement (doi:10.3390/antibiotics11020165), 2022-01-27
Supplement: s1 [file s1]

**Table S6.** Performance metrics of 3 classification models used to study the association between good to excellent antimicrobial stewardship practices and survey responses in 113 conventional California dairies during 2019.

|                            | Classification model |               |                   |
|----------------------------|----------------------|---------------|-------------------|
|                            | Decision tree        | Random forest | Gradient boosting |
| Specificity                | 78.26%               | 78.26%        | 78.26%            |
| Sensitivity/Recall         | 32.56%               | 46.51%        | 60.47%            |
| Precision                  | 84.85%               | 88.89%        | 73.55             |
| F1 statistics              | 47.06%               | 61.07%        | 66.37%            |
| Balanced Accuracy          | 55.41                | 62.38%        | 69.36%            |
| Area under ROC Curve (AUC) | 0.81                 | 0.74          | 0.96              |
