# Supplementary material for: Factors Associated with Antimicrobial Stewardship Practices on California Dairies: One Year Post Senate Bill 27
Source: MDPI journal article supplement (doi:10.3390/antibiotics11020165), 2022-01-27
Supplement: s1 [file s1]

**Table S4:** Estimated coefficients and odds ratios from a multilevel mixed effects logistic regression model for the association between survey factors and decreased AMD cost compared to 2018.

| Variables                                                     | Coefficient | SE   | Odds Ratio | 95% CI |       | <i>P</i> -value <sup>1</sup> |
|---------------------------------------------------------------|-------------|------|------------|--------|-------|------------------------------|
|                                                               |             |      |            | Lower  | Upper |                              |
| <b>Region<sup>2</sup></b>                                     |             |      |            |        |       |                              |
| GSCA                                                          | Referent    |      |            |        |       |                              |
| NCA + NSJV                                                    | 0.51        | 0.55 | 1.67       | 0.61   | 4.86  | 0.35                         |
| <b>Herd size, milking cows</b>                                |             |      |            |        |       |                              |
| <1304                                                         | Referent    |      |            |        |       |                              |
| ≥1304                                                         | 0.33        | 0.58 | 1.39       | 0.45   | 4.32  | 0.56                         |
| <b>Breed</b>                                                  |             |      |            |        |       |                              |
| Holstein                                                      | Referent    |      |            |        |       |                              |
| Jersey                                                        | 1.82        | 1.41 | 6.20       | 0.40   | 97.40 | 0.20                         |
| Crossbred                                                     | -1.38       | 1.34 | 0.25       | 0.01   | 3.43  | 0.30                         |
| Mix/Other                                                     | -0.71       | 0.65 | 0.48       | 0.14   | 1.75  | 0.27                         |
| <b>Farm's animal health</b>                                   |             |      |            |        |       |                              |
| No Change+ Worse                                              | Referent    |      |            |        |       |                              |
| Better                                                        | 1.70        | 0.55 | 5.48       | 1.85   | 16.17 | <0.01                        |
| <b>Use or increased use of alternatives to AMD since 2018</b> |             |      |            |        |       |                              |
| No                                                            | Referent    |      |            |        |       |                              |
| Yes                                                           | 2.11        | 0.58 | 7.89       | 2.54   | 24.57 | <0.01                        |

<sup>1</sup> Factors are statistically significant at  $P \leq 0.05$ .

<sup>2</sup> Northern California (NCA), Northern San Joaquin Valley (NSJV), and Greater Southern California (GSCA).
