# Supplementary material for: Factors Associated with Antimicrobial Stewardship Practices on California Dairies: One Year Post Senate Bill 27
Source: MDPI journal article supplement (doi:10.3390/antibiotics11020165), 2022-01-27
Supplement: s1 [file s1]

**Table S3:** Estimated coefficients and odds ratios from a multilevel mixed effects logistic regression model for the association between survey factors and having farm made changes in management to prevent spread of disease.

| Variables                                                                | Coefficient | SE   | Odds Ratio | 95% CI |        | P-value <sup>1</sup> |
|--------------------------------------------------------------------------|-------------|------|------------|--------|--------|----------------------|
|                                                                          |             |      |            | Lower  | Upper  |                      |
| <b>Region<sup>2</sup></b>                                                |             |      |            |        |        |                      |
| GSCA                                                                     | Referent    |      |            |        |        |                      |
| NCA + NSJV                                                               | -1.20       | 0.72 | 0.30       | 0.07   | 1.22   | 0.09                 |
| <b>Herd size, milking cows</b>                                           |             |      |            |        |        |                      |
| <1304                                                                    | Referent    |      |            |        |        |                      |
| ≥1304                                                                    | -0.70       | 0.74 | 0.49       | 0.11   | 2.14   | 0.35                 |
| <b>Breed<sup>3</sup></b>                                                 |             |      |            |        |        |                      |
| Holstein                                                                 | Referent    |      |            |        |        |                      |
| Other (Jersey, crossbred, mix)                                           | 0.88        | 0.70 | 2.41       | 0.61   | 9.55   | 0.21                 |
| <b>Who review/revise the animal health protocols</b>                     |             |      |            |        |        |                      |
| Dairy personnel                                                          | Referent    |      |            |        |        |                      |
| Veterinarian                                                             | 2.60        | 1.10 | 13.49      | 1.71   | 106.47 | 0.01                 |
| <b>Farm's animal health</b>                                              |             |      |            |        |        |                      |
| No Change                                                                | Referent    |      |            |        |        |                      |
| Better                                                                   | 1.56        | 0.69 | 4.79       | 1.21   | 18.87  | 0.02                 |
| Worse                                                                    | 0.72        | 1.43 | 2.04       | 0.12   | 34.23  | 0.62                 |
| <b>Use or increased use of protective alternatives to AMD since 2018</b> |             |      |            |        |        |                      |
| No                                                                       | Referent    |      |            |        |        |                      |
| Yes                                                                      | 1.50        | 0.65 | 4.40       | 1.23   | 15.72  | 0.02                 |

<sup>1</sup>Factors are statistically significant at  $P \leq 0.05$ .

<sup>2</sup> Northern California (NCA), Northern San Joaquin Valley (NSJV), and Greater Southern California (GSCA)

<sup>3</sup> Breed was categorized into two levels: Holstein and others (Jersey, crossbreed, and mixed herds). Dairies with jersey and crossbreed cows were all did not report change in management practices.
