# Supplementary material for: Factors Associated with Antimicrobial Stewardship Practices on California Dairies: One Year Post Senate Bill 27
Source: MDPI journal article supplement (doi:10.3390/antibiotics11020165), 2022-01-27
Supplement: s1 [file s1]

**Table S1.** Summary of herd characteristics from 113 responses received from conventional dairies to a mailed questionnaire on antimicrobial drug (AMD) use in adult cows on California during 2019.

| Variables                                      | n          | Estimate (%) | 95% Confidence limits |       |
|------------------------------------------------|------------|--------------|-----------------------|-------|
|                                                |            |              | Lower                 | Upper |
| <b>Respondent role</b>                         | <b>113</b> |              |                       |       |
| Manager                                        | 23         | 20.35        | 13.83                 | 28.92 |
| Owner                                          | 66         | 58.41        | 48.99                 | 67.24 |
| Owner-Manager                                  | 21         | 15.58        | 12.36                 | 26.97 |
| Veterinarian                                   | 3          | 2.65         | 0.84                  | 8.03  |
| <b>Region</b>                                  | <b>113</b> |              |                       |       |
| Northern California (NCA)                      | 8          | 7.07         | 3.54                  | 13.65 |
| Northern Central (NSJV)                        | 53         | 46.92        | 37.77                 | 56.24 |
| Greater southern California (GSCA)             | 52         | 46.01        | 36.92                 | 55.37 |
| <b>Herd size (# of cow)</b>                    | <b>113</b> |              |                       |       |
| ≤1304                                          | 61         | 53.98        | 44.62                 | 63.07 |
| >1304                                          | 52         | 46.01        | 36.92                 | 55.37 |
| <b>Rolling herd average (kg/cow)</b>           | <b>107</b> |              |                       |       |
| <10,880                                        | 19         | 17.76        | 11.54                 | 26.32 |
| ≥10,880                                        | 88         | 82.24        | 73.67                 | 88.46 |
| <b>Bulk tank somatic cell count (cells/mL)</b> | <b>112</b> |              |                       |       |
| <100,000                                       | 14         | 12.50        | 7.48                  | 20.14 |
| 100,000-199,999                                | 69         | 61.61        | 52.15                 | 70.25 |
| ≥200,000                                       | 29         | 25.89        | 18.52                 | 34.92 |
| <b>Breed</b>                                   | <b>112</b> |              |                       |       |
| Holstein                                       | 63         | 56.25        | 46.81                 | 65.25 |
| Jersey                                         | 3          | 2.68         | 0.85                  | 8.11  |
| Crossbred                                      | 6          | 5.36         | 2.39                  | 11.54 |
| Mixed herds (Holstein and Jersey)              | 40         | 35.71        | 27.28                 | 45.13 |
