# Supplementary material for: Factors Associated with Antimicrobial Stewardship Practices on California Dairies: One Year Post Senate Bill 27
Source: MDPI journal article supplement (doi:10.3390/antibiotics11020165), 2022-01-27
Supplement: s1 [file s1]

**Table S2:** Estimated coefficients and odds ratios from a multilevel mixed effects logistic regression model for the association between survey factors and decreased use of antimicrobial drugs (AMD) that were previously available over the counter.

| Variables                                                                | Coefficient | SE   | Odds Ratio | 95% CI |       | <i>P</i> -value <sup>1</sup> |
|--------------------------------------------------------------------------|-------------|------|------------|--------|-------|------------------------------|
|                                                                          |             |      |            | Lower  | Upper |                              |
| <b>Region<sup>2</sup></b>                                                |             |      |            |        |       |                              |
| GSCA                                                                     | Referent    |      |            |        |       |                              |
| NCA + NSJV                                                               | 0.42        | 0.53 | 1.53       | 0.53   | 4.37  | 0.43                         |
| <b>Herd size</b>                                                         |             |      |            |        |       |                              |
| <1304                                                                    | Referent    |      |            |        |       |                              |
| ≥1304                                                                    | 1.83        | 0.68 | 6.30       | 1.64   | 24.10 | <0.01                        |
| <b>Breed</b>                                                             |             |      |            |        |       |                              |
| Holstein                                                                 | Referent    |      |            |        |       |                              |
| Jersey                                                                   | 0.21        | 1.76 | 1.23       | 0.03   | 39.66 | 0.91                         |
| Crossbred                                                                | 1.25        | 1.46 | 3.52       | 0.20   | 61.91 | 0.39                         |
| Mix/Other                                                                | 1.01        | 0.68 | 2.75       | 0.71   | 10.58 | 0.13                         |
| <b>Use or increased use of preventive alternatives to AMD since 2018</b> |             |      |            |        |       |                              |
| No                                                                       | Referent    |      |            |        |       |                              |
| Yes                                                                      | 1.17        | 0.58 | 3.23       | 1.02   | 10.21 | 0.04                         |

<sup>1</sup>Factors are statistically significant at  $P \leq 0.05$ .

<sup>2</sup> Northern California (NCA), Northern San Joaquin Valley (NSJV), and Greater Southern California (GSCA)
