# Supplementary material for: Factors Associated with Antimicrobial Stewardship Practices on California Dairies: One Year Post Senate Bill 27
Source: Antibiotics (Basel). 2022 Jan 27;11(2):165. doi: 10.3390/antibiotics11020165 (PMC8868138; doi:10.3390/antibiotics11020165)
Supplement: Supplementary file 1 [file antibiotics-11-00165-s001.zip]

Archive with 8 entries (8 files):
- Antibiotics Table S1_012622.pdf
- Antibiotics Table S2_012622.pdf
- Antibiotics Table S3_012622.pdf
- Antibiotics Table S4_012622.pdf
- Antibiotics Table S5_012622.pdf
- Antibiotics Table S6_012622.pdf
- Antibiotics_Figure S1_012622.pdf
- Antibiotics_Figure S2_012622.pdf
